# Supplementary material for: DSC2 suppresses the growth of gastric cancer through the inhibition of nuclear translocation of γ-catenin and PTEN/PI3K/AKT signaling pathway
Source: publisher site journal article supplement (doi:10.18632/aging.204858), 2023-07-08
Supplement: Supplementary file [file aging-v15i13-204858-supplementary-material-SD2.pdf]

**SUPPLEMENTARY TABLE**

**Supplementary Table 1. Proteomic analysis of proteins linked by DSC2.**

| <b>Gene name</b> | <b>Protein Name</b>                                           | <b>Peptides (95%)</b> | <b>% Coverage of 95% confidence intervals</b> |
|------------------|---------------------------------------------------------------|-----------------------|-----------------------------------------------|
| DSP              | Desmoplakin                                                   | 48                    | 18                                            |
| KRT1             | Cytokeratin-1                                                 | 35                    | 60                                            |
| TFRC             | Transferrin receptor protein 1                                | 30                    | 47                                            |
| KRT9             | Keratin, type I cytoskeletal 9                                | 30                    | 65                                            |
| BRD4             | Bromodomain-containing protein 4                              | 29                    | 55                                            |
| ALB              | Albumin                                                       | 26                    | 43                                            |
| PLEC             | Plectin                                                       | 20                    | 6                                             |
| IGF2R            | Cation-independent mannose-6-phosphate receptor               | 20                    | 9                                             |
| HSPD1            | 60 kDa chaperonin                                             | 20                    | 47                                            |
| JUP              | Junction plakoglobin                                          | 19                    | 35                                            |
| ACAD9            | Acyl-Coenzyme A dehydrogenase family, member 9, isoform CRA_b | 19                    | 42                                            |
| PKM              | Pyruvate kinase PKM                                           | 17                    | 41                                            |
| HSPA1B           | Heat shock 70 kDa protein 1B                                  | 16                    | 39                                            |
| KRAS             | KRAS protein                                                  | 16                    | 25                                            |
| CTNNA1           | Catenin alpha-1                                               | 16                    | 22                                            |
| TRIM21           | E3 ubiquitin-protein ligase TRIM21                            | 15                    | 32                                            |
| LTF              | Lactotransferrin                                              | 15                    | 26                                            |
| EEF2             | Elongation factor 2                                           | 15                    | 22                                            |
| ANXA2            | Annexin A2                                                    | 15                    | 44                                            |
| ITGB1            | Integrin beta                                                 | 14                    | 21                                            |
| HSPA8            | Heat shock cognate 71 kDa protein                             | 14                    | 45                                            |
| LAMP1            | Lysosome-associated membrane glycoprotein 1                   | 14                    | 23                                            |
| HSP90AB1         | Heat shock protein HSP 90-beta                                | 14                    | 34                                            |
| DSG1             | Desmoglein-1                                                  | 14                    | 18                                            |
| TUFM             | Elongation factor Tu                                          | 13                    | 28                                            |
| KRT80            | Keratin, type II cytoskeletal 80                              | 13                    | 31                                            |
| DDX5             | DEAD box protein 5                                            | 12                    | 29                                            |
| VIM              | Vimentin                                                      | 11                    | 28                                            |
| RPS4X            | RPS4X protein                                                 | 11                    | 44                                            |
| LMNB1            | Lamin-B1                                                      | 11                    | 34                                            |
| ITGAV            | Integrin alpha-V                                              | 11                    | 10                                            |
| DDX3X            | ATP-dependent RNA helicase DDX3X                              | 11                    | 22                                            |
| ATP2A1           | Sarcoplasmic/endoplasmic reticulum calcium ATPase 1           | 11                    | 11                                            |
| AZGP1            | Zinc-alpha-2-glycoprotein                                     | 10                    | 30                                            |
| ALDOA            | Fructose-bisphosphate aldolase A                              | 10                    | 34                                            |
